# Supplementary material for: A highly selective fluorescent chemosensor based on a quinoline derivative for zinc ions in pure water
Source: Royal Society of Chemistry journal article supplement (doi:10.1039/c5ra09954d), 2015-01-01
Supplement: c5ra09954d1.pdf [file c5ra09954d1.pdf]

## Supporting Information

### **A highly selective fluorescent chemosensor based on quinoline derivative for zinc ion in pure water**

Ye Won Choi, Jae Jun Lee, Cheal Kim\*

*Department of Fine Chemistry and Department of Interdisciplinary Bio IT Materials, Seoul  
National University of Science and Technology, Seoul 139-743, Korea. Fax: +82-2-973-9149;  
Tel: +82-2-970-6693; E-mail: [chealkim@seoultech.ac.kr](mailto:chealkim@seoultech.ac.kr)*

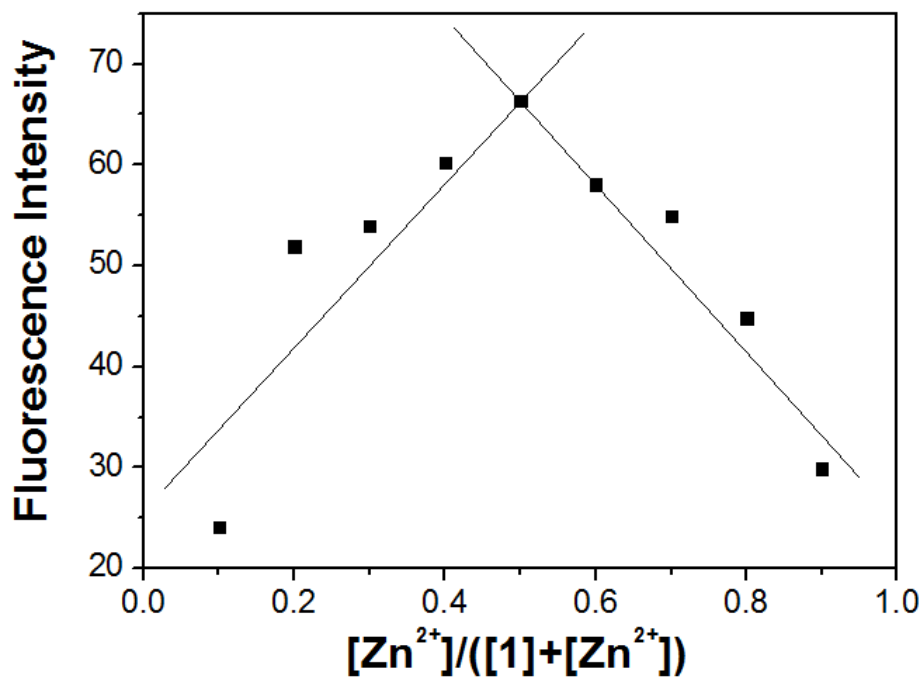

**Fig. S1** Job plot of **1** and Zn<sup>2+</sup> in buffer solution (10 mM bis-tris, pH 7.0). The total concentrations of **1** and Zn<sup>2+</sup> were 50  $\mu$ M.

(a)

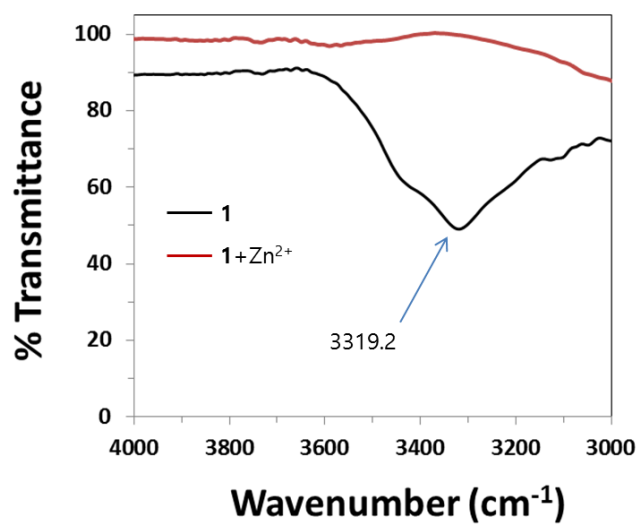

(b)

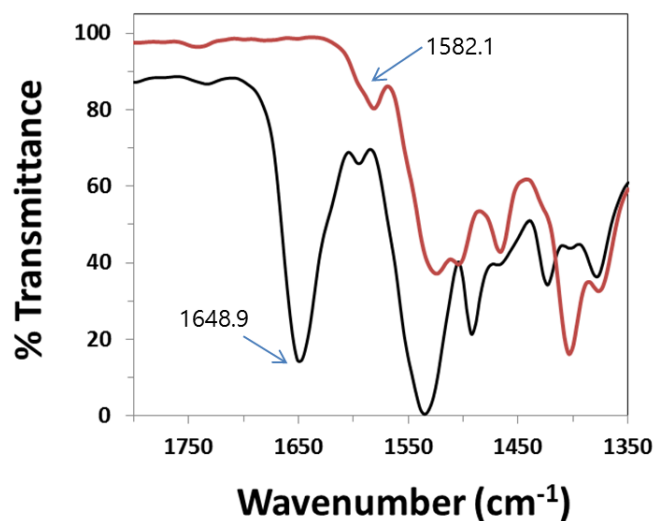

**Fig. S2** (a) FT-IR spectra of **1** and  $\text{1-Zn}^{2+}$  complex in the range of wavenumber 4000-3000  $\text{cm}^{-1}$ . (b) FT-IR spectra of **1** and  $\text{1-Zn}^{2+}$  complex in the range of wavenumber 1900-1350  $\text{cm}^{-1}$ .

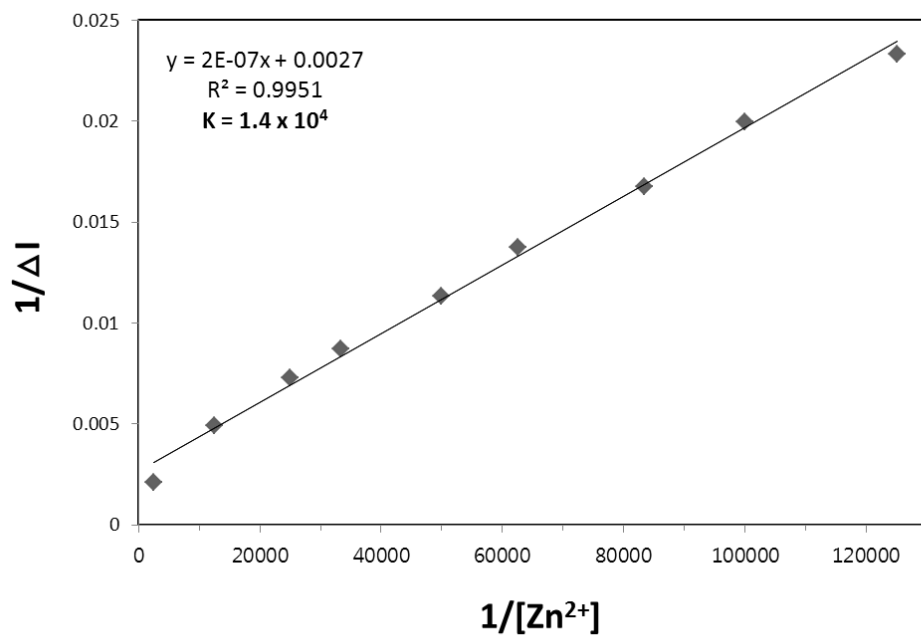

**Fig. S3** Benesi-Hildebrand plot of **1** (at 536 nm), assuming 1:1 stoichiometry for association between **1** and  $Zn^{2+}$ .

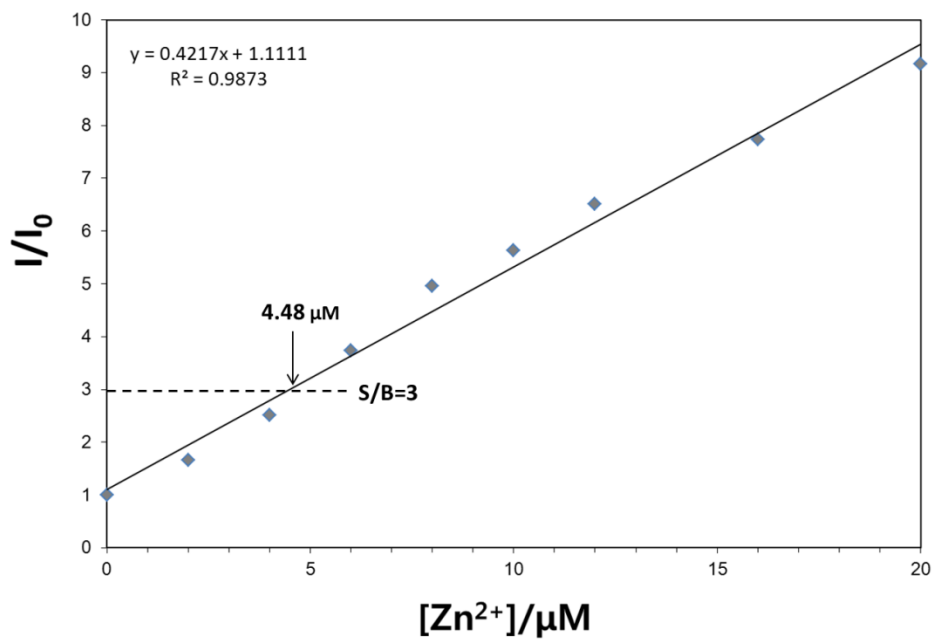

**Fig. S4** Change in the ratio of fluorescence intensity ( $\lambda_{ex} = 350 \text{ nm}$ ;  $\lambda_{em} = 536 \text{ nm}$ ) of **1** ( $20 \mu M$ ) with  $Zn^{2+}$ .

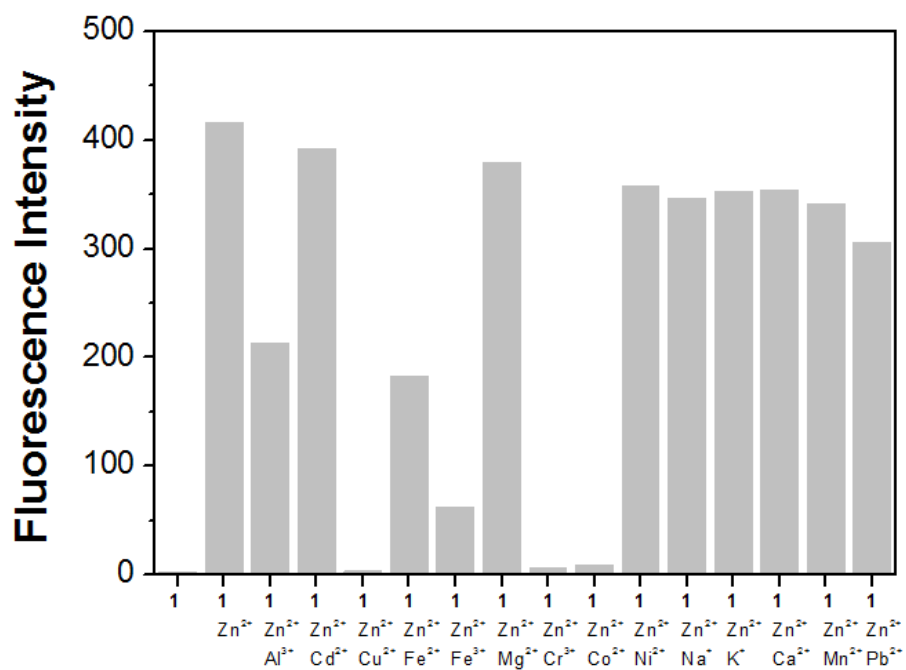

**Fig. S5** Competitive selectivity of **1** (20  $\mu\text{M}$ ) toward  $\text{Zn}^{2+}$  (20 equiv) in the presence of other metal ions (20 equiv) in buffer solution (10 mM bis-tris, pH 7.0).

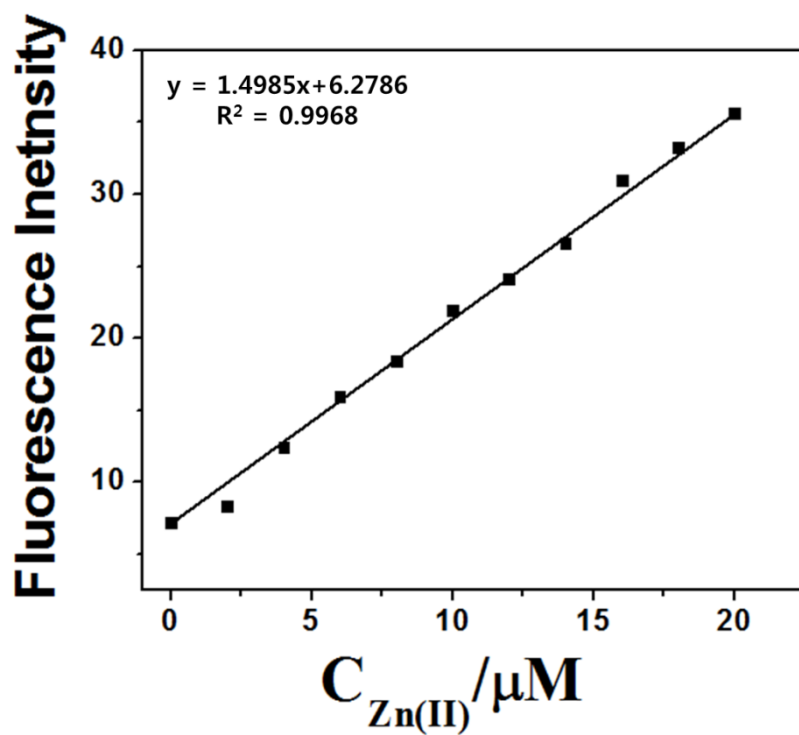

**Fig. S6** Fluorescence intensity (at 536 nm) of **1** as a function of  $Zn^{2+}$  concentration ( $[1] = 20 \mu mol/L$  and  $[Zn^{2+}] = 0.0-20.0 \mu mol/L$ ).

(a)

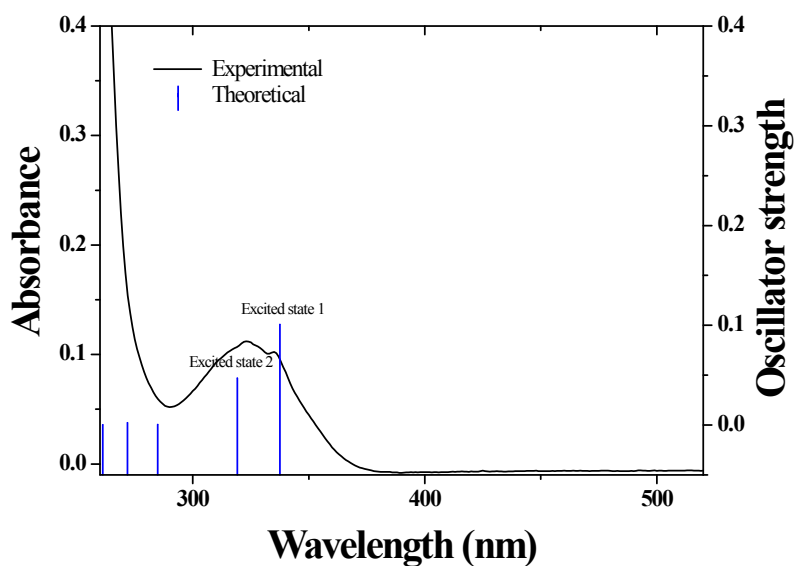

(b)

| Excited State 1 | Wavelength | Percent (%) | Oscillator strength |
|-----------------|------------|-------------|---------------------|
| H → L           | 337.51 nm  | 99 %        | 0.1009              |
| Excited State 2 | Wavelength | Percent (%) | Oscillator strength |
| H-1 → L         | 319.24 nm  | 96 %        | 0.047               |
| H → L           |            | 2 %         |                     |

(c)

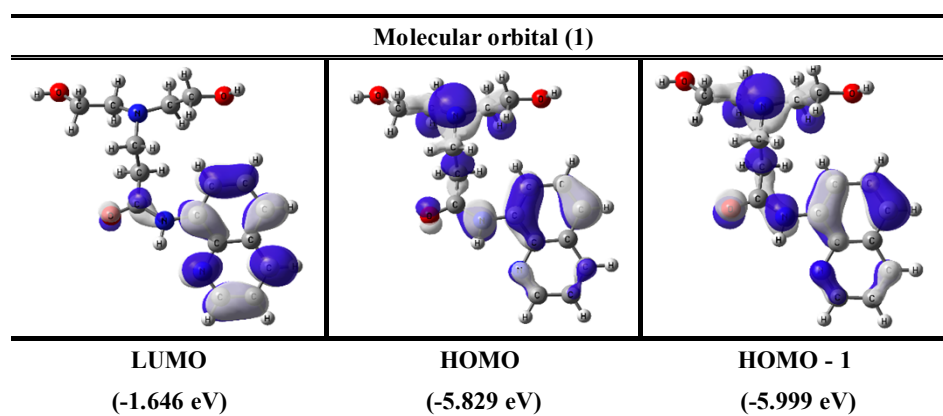

**Fig. S7** (a) The theoretical excitation energies and the experimental UV-vis spectrum of **1**. (b) The major electronic transition energies and molecular orbital contributions for **1** (H = HOMO and L = LUMO). (c) Isosurface (0.030 electron bohr<sup>-3</sup>) of molecular orbitals participating in the major singlet excited states of **1**.



(a)

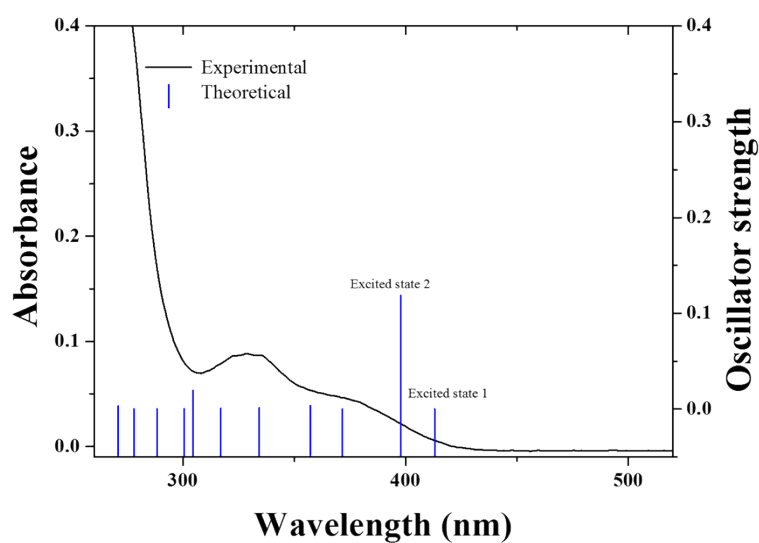

(b)

| Excited State 1 | Wavelength | Percent (%) | Oscillator strength |
|-----------------|------------|-------------|---------------------|
| H → L           | 412.99 nm  | 99 %        | 0.0004              |
| Excited State 2 | Wavelength | Percent (%) | Oscillator strength |
| H-1 → L         | 397.83 nm  | 98 %        | 0.1188              |

(c)

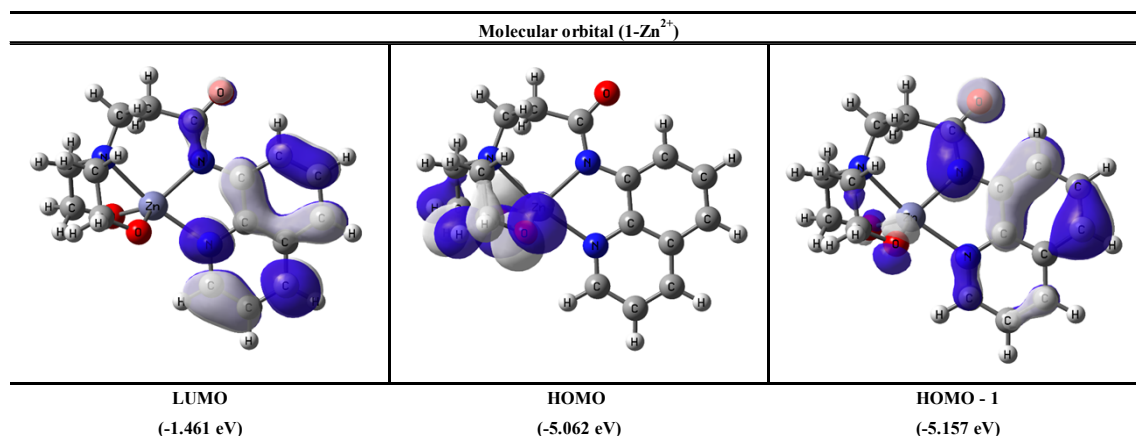

**Fig. S8** (a) The theoretical excitation energies and the experimental UV-vis spectrum of **1-Zn<sup>2+</sup>**. (b) The major electronic transition energies and molecular orbital contributions for **1-Zn<sup>2+</sup>** (H = HOMO and L = LUMO). (c) Isosurface (0.030 electron bohr<sup>-3</sup>) of molecular orbitals participating in the major singlet excited states of **1-Zn<sup>2+</sup>**.
